# Supplementary material
Source: HighWire-hosted journal article supplement (https://thorax.bmj.com/content/thoraxjnl-2020-216007)
Supplement: inline-supplementary-material-1 [file inline-supplementary-material-1.pdf]

Efficacy of unsupervised exercise in adults with obstructive lung disease: a systematic review and meta-analysis

Daniel Taylor<sup>1#</sup>, Alex R. Jenkins<sup>2#</sup>, Kate Parrott<sup>3</sup>, Alex Benham<sup>4</sup>, Samantha Targett<sup>5</sup> and Arwel W. Jones<sup>6#</sup>

<sup>1</sup>School of Sport and Exercise Science, University of Lincoln, UK.

<sup>2</sup>Division of Respiratory Medicine, University of Nottingham, UK.

<sup>3</sup>Physiotherapy Department, Lincoln County Hospital, UK.

<sup>4</sup>School of Human and Health Sciences, University of Huddersfield, UK.

<sup>5</sup>School of Health and Social Care, University of Lincoln, UK.

<sup>6</sup>Department of Allergy, Immunology and Respiratory Medicine, Monash University, Melbourne, Australia.

#Authors contributed equally and should be considered co-first authors

## Supplementary material

**Table S1.** Example search strategy of a bibliographic database (CINAHL)

| No. | Search Term                                                                                                                                  | Field  |
|-----|----------------------------------------------------------------------------------------------------------------------------------------------|--------|
| 1   | Lung Diseases, Obstructive                                                                                                                   | MH     |
| 2   | Bronchiectasis                                                                                                                               | MH     |
| 3   | bronchiect*                                                                                                                                  | TX     |
| 4   | bronchoect*                                                                                                                                  | TX     |
| 5   | non\$cystic fibrosis                                                                                                                         | TX     |
| 6   | non\$CF                                                                                                                                      | TX     |
| 7   | Asthma                                                                                                                                       | MH, TX |
| 8   | Bronchoconstriction                                                                                                                          | MH     |
| 9   | Bronchial Spasm                                                                                                                              | MH     |
| 10  | Respiratory Hypersensitivity                                                                                                                 | MH     |
| 11  | Bronchitis, Chronic                                                                                                                          | MH     |
| 12  | Emphysema                                                                                                                                    | MH, TX |
| 13  | chronic N3 bronchi*                                                                                                                          | TX     |
| 14  | COPD                                                                                                                                         | TX     |
| 15  | COAD                                                                                                                                         | TX     |
| 16  | COBD                                                                                                                                         | TX     |
| 17  | AECB                                                                                                                                         | TX     |
| 18  | AECOPD                                                                                                                                       | TX     |
| 19  | 1 OR 2 OR 3 OR 4 OR 5 OR 6 OR 7 OR 8 OR 9 OR 10 OR 11 OR 12 OR 13 OR 14 OR 15 OR 16 OR 17 OR 18                                              |        |
| 20  | Exercise                                                                                                                                     | MH     |
| 21  | Therapeutic Exercise                                                                                                                         | MH     |
| 22  | Exertion                                                                                                                                     | MH     |
| 23  | Physical Fitness                                                                                                                             | MH     |
| 24  | Activities of Daily Living                                                                                                                   | MH     |
| 25  | Telerehabilitation                                                                                                                           | MH     |
| 26  | Exerc* N4 (train* OR fitness OR physi* OR condition* OR strength* OR resist* OR aerobic* OR intervent* OR therap* OR unsupervi* OR program*) | TI, AB |
| 27  | Self\$manage*                                                                                                                                | TI, AB |
| 28  | physical activit*                                                                                                                            | TI, AB |
| 29  | Rehabilitat*                                                                                                                                 | TI, AB |
| 30  | Home\$rehab*                                                                                                                                 | TI, AB |
| 31  | Home\$based                                                                                                                                  | TI, AB |
| 32  | Home N4 based                                                                                                                                | TI, AB |
| 33  | 20 OR 21 OR 22 OR 23 OR 24 OR 25 OR 26 OR 27 OR 28 OR 29 OR 30 OR 31 OR 32                                                                   |        |
| 34  | Clinical trials                                                                                                                              | MH     |
| 35  | Randomised Controlled Trials                                                                                                                 | MH     |
| 36  | Random assignment                                                                                                                            | MH     |
| 37  | Randomised OR randomized                                                                                                                     | TI, AB |
| 38  | Randomly                                                                                                                                     | TI, AB |
| 39  | Trial                                                                                                                                        | TI, AB |
| 40  | allocated N2 random*                                                                                                                         | TI, AB |
| 41  | 34 OR 35 OR 36 OR 37 OR 38 OR 39 OR 40                                                                                                       |        |
| 42  | 19 AND 33 AND 41                                                                                                                             |        |

Notes: \*Truncation operator.

**Table S2.** List of extracted data and study characteristics

| <b>Data extraction</b>   |                                                                                                                                                                                                                                                                             |
|--------------------------|-----------------------------------------------------------------------------------------------------------------------------------------------------------------------------------------------------------------------------------------------------------------------------|
| Study details            | <ul style="list-style-type: none"> <li>- Date of study</li> <li>- Title</li> <li>- Author</li> <li>- Study aim(s)</li> <li>- Total study duration</li> </ul>                                                                                                                |
| Methods                  | <ul style="list-style-type: none"> <li>- Study design</li> <li>- Intervention</li> <li>- Primary outcome(s)</li> <li>- Secondary outcome(s)</li> </ul>                                                                                                                      |
| Participants             | <ul style="list-style-type: none"> <li>- Population demographics (age, gender, diagnosis/condition, disease severity, comorbidities)</li> <li>- Inclusion/Exclusion criteria</li> <li>- Total number randomised and randomisation ratio</li> </ul>                          |
| Intervention/Comparators | <ul style="list-style-type: none"> <li>- Number randomised to groups</li> <li>- Description of intervention and comparator (setting, method of delivery/support, content, frequency, intensity, time, type, duration)</li> <li>- Details of any 'run-in' session</li> </ul> |
| Outcomes                 | <ul style="list-style-type: none"> <li>- Outcome name and definition</li> <li>- Outcome type</li> <li>- Method of outcome measurement and reporting</li> <li>- Missing data and reasoning</li> </ul>                                                                        |

**Table S3.** Characteristics of all included studies

| Study (Country)                    | Sample size, Gender, Age                                                                                                                | Inclusion/ Exclusion criteria                                                                                                                                                                                                                                                                                                                                                                                                                                                                                                                   | Respiratory diagnosis & disease characteristics | Study aim, Design, Unit of allocation                                                                                                                                                                                                   | Exercise intervention (setting, components, duration, frequency)                                                                                                                                                                                                                                                                                                             | Primary outcome (1) Other outcomes & follow up (2)                                                        |
|------------------------------------|-----------------------------------------------------------------------------------------------------------------------------------------|-------------------------------------------------------------------------------------------------------------------------------------------------------------------------------------------------------------------------------------------------------------------------------------------------------------------------------------------------------------------------------------------------------------------------------------------------------------------------------------------------------------------------------------------------|-------------------------------------------------|-----------------------------------------------------------------------------------------------------------------------------------------------------------------------------------------------------------------------------------------|------------------------------------------------------------------------------------------------------------------------------------------------------------------------------------------------------------------------------------------------------------------------------------------------------------------------------------------------------------------------------|-----------------------------------------------------------------------------------------------------------|
| Booker, 1984 (1) (UK)              | 103 participants*<br>Ex: n=32<br>Con: n=37<br>Phys: n=34<br>Age & Gender data not available                                             | Not reported                                                                                                                                                                                                                                                                                                                                                                                                                                                                                                                                    | COPD<br>Disease characteristics not reported    | To investigate the effects of progressive exercise training and physiotherapy on patients with Chronic Airflow limitation and to see if these effects were maintained once hospital visits had ceased.<br>RCT, individual               | Daily stair climbing intervention with progressive targets for 9-weeks. Study included 3-, 6- & 12-month follow-ups.<br>F: 1-2 times daily<br>I: Not reported<br>T: 2-15 mins<br>T: Aerobic & Strength<br>Run-in: N/A<br>Support: Teaching of breathing control.<br>Con: Usual care                                                                                          | (1) Lung function, blood gases, 6MWT<br>(2) Anxiety & Depression, ADL                                     |
| Bourbeau et al., 2003 (2) (Canada) | 191 participants<br>Int: n=96<br>Con: n=95<br>Males: n=106<br>Females: n=85<br>Age, mean $\pm$ SD<br>Int: 70 $\pm$ 7<br>Con: 69 $\pm$ 7 | Inclusion: Stable COPD, $\geq$ 50 years of age, current or previous smoker ( $\geq$ 10 pack-years), FEV <sub>1</sub> between 25%-70% of predicted & FEV <sub>1</sub> /FVC < 70%, no previous diagnosis of asthma, left congestive heart failure, terminal disease, dementia, or uncontrolled psychiatric illness, no participation in a respiratory rehabilitation program in the past year, no long-term-care facility stays.                                                                                                                  | COPD<br>Stable, moderate-severe                 | To evaluate the impact of a self-management program on the use of hospital services and health status.<br>RCT, individual                                                                                                               | Home-based exercise intervention for 1 year. Study included 4-month follow-up.<br>F: 3 days/week<br>I: Guided by Borg score<br>T: 30-45 min<br>T: Aerobic & Strength<br>Run-in: Supervised session at home<br>Support: Living Well with COPD booklet (supervised education component). Monthly telephone calls.<br>Con: Same level of care without add-on management program | (1) Hospital admission<br>(2) Exacerbations, healthcare utilisation, mortality, SGRQ, lung function, 6MWT |
| Boyd et al., 2012 (3) (USA)        | 16 participants<br>Int: n=8<br>Con: n=8<br>Males: n=1<br>Females: n=15<br>Age, mean (range)<br>Int: 53 (38-62)<br>Con: 54 (33-78)       | Inclusion: Asthma diagnosis, patients undertaking aerobic exercise $\geq$ 3 times a week 6-months prior to study enrolment.<br>Exclusion: Reversible airflow obstruction was utilized to exclude patients with other causes of dyspnoea, current smokers (within 6-months) or with >10 pack-year smoking history, coronary artery disease, congestive heart failure, stroke, severe hypertension, immunodeficiency states, or other conditions that would have interfered with participation, unable or unwilling to provide consent, unable to | Asthma<br>Mild-moderate                         | To determine feasibility for a larger, future study that will define the effect of moderate intensity aerobic exercise on cellular, molecular, and functional measures in adults with mild-moderate severity asthma.<br>RCT, individual | Community centre walking program for 12-weeks.<br>F: 3 days/week<br>I: Steady state intensity that achieved 60-75% HRmax<br>T: 40 min<br>T: Aerobic<br>Run-in: N/A<br>Support: 3-month gym membership. Education component included.<br>Con: Education only                                                                                                                  | (1) Serum ECP<br>(2) ACQ, inflammatory markers, lung function, VO <sub>2</sub> peak                       |

|                                             |                                                                                                                                           |                                                                                                                                                                                                                                                                                                                                                                                            |                                      |                                                                                                                                                                                               |                                                                                                                                                                                                                                                                                                                                                                                                                                                              |                                              |
|---------------------------------------------|-------------------------------------------------------------------------------------------------------------------------------------------|--------------------------------------------------------------------------------------------------------------------------------------------------------------------------------------------------------------------------------------------------------------------------------------------------------------------------------------------------------------------------------------------|--------------------------------------|-----------------------------------------------------------------------------------------------------------------------------------------------------------------------------------------------|--------------------------------------------------------------------------------------------------------------------------------------------------------------------------------------------------------------------------------------------------------------------------------------------------------------------------------------------------------------------------------------------------------------------------------------------------------------|----------------------------------------------|
|                                             |                                                                                                                                           | perform the exercise protocol or provide pre- and post-study measurements or be contacted via telephone or who intended to move out of the area within 6-months.                                                                                                                                                                                                                           |                                      |                                                                                                                                                                                               |                                                                                                                                                                                                                                                                                                                                                                                                                                                              |                                              |
| Cameron-Tucker et al., 2016 (4) (Australia) | 65 participants<br>Int: n=35<br>Con: n=30<br>Males: n=29<br>Females: n=36<br>Age, mean $\pm$ SD<br>Int: 68 $\pm$ 9.9<br>Con: 70 $\pm$ 6.8 | Inclusion: >18 years of age, COPD diagnosis, >2 months post exacerbation.<br>Exclusion: Cognitive impairment, unable to consent, could not complete questionnaires, did not meet safety to exercise criteria, had attended PR in the previous 2 years.                                                                                                                                     | COPD<br>Stable, mild-very severe     | To evaluate the effectiveness of tele-rehab followed by PR versus usual care, that is, a waiting period followed by the same PR.<br>RCT, individual                                           | Tele-rehab walking program for 8-weeks before supervised PR<br>F: Daily<br>I: Moderate<br>T: 30min<br>T: Aerobic<br>Run-in: N/A<br>Support: Weekly telephone calls.<br>Con: Usual care                                                                                                                                                                                                                                                                       | (1) 6MWT<br>(2) CAT, SNAPPS                  |
| Chen et al., 2018 (5) (China)               | 47 participants<br>Int: n=25<br>Con: n=22<br>Males: n=37<br>Females: n=10<br>Age, mean $\pm$ SD<br>Int: 69 $\pm$ 8<br>Con: 65 $\pm$ 12    | Inclusion: COPD diagnosis, voluntary participation and signed consent, spouse or child who supports the completion of the intervention and space time for the intervention, never attended PR.<br>Exclusion: MSK or neurologic condition affecting exercise, symptomatic cardiac disease or previous lung surgery, AECOPD requiring change in medication within 2-months, mMRC score of 4. | COPD<br>Stable, moderate-very severe | To evaluate the feasibility of home-based lower limb resistance training in COPD patients and assess the effect of the programme on muscle strength and functional status.<br>RCT, individual | Home-based lower-limb exercise intervention for 12-weeks. Six exercises with 8-12 repetitions.<br>F: 3 days/week<br>I: Best effort, not exceeding Borg score of 5<br>T: 20-30 min<br>T: Resistance<br>Run-in: 1 study visit<br>Support: Exercise supervised by family member<br>Con: Usual care                                                                                                                                                              | (1) Muscle strength<br>(2) FTSSST, 6MWT, CAT |
| De Oliveira et al., 2010 (6) (Brazil)       | 62 participants<br>Int: n=33<br>Con: n=29<br>Males: n=46<br>Females: n=16<br>Age, mean $\pm$ SD<br>Int: 66 $\pm$ 10<br>Con: 71 $\pm$ 9    | Inclusion: COPD diagnosis, clinically stable COPD for at least 8 weeks.<br>Exclusion: Hospitalization, clinically unstable COPD, presence of neuromuscular disease, associated respiratory disease, orthopaedic or neurological disease that affected gait; recent impairment due to comorbidities.                                                                                        | COPD<br>Stable, mild-severe          | To carry out a comparative analysis of patients with COPD submitted to PR in a clinical setting and at home.<br>RCT, individual                                                               | Home-based PR program for 12 weeks. Walking, upper and lower limb weight exercises (10 reps).<br>F: 3 days/week<br>I: 60-80% HRmax based on 6MWT (walking). Initial load of 50% of 1 rep max, increase of 0.5kg every 2-weeks until tolerance reached (weights)<br>T: Not reported<br>T: Aerobic & Strength<br>Run-in: 1 study visit<br>Support: Regular telephone calls to reinforce rehab and set new targets. Education also included.<br>Con: Usual care | (1) 6MWT<br>(2) BODE                         |

|                                      |                                                                                                                                         |                                                                                                                                                                                                                                                                                                                                                                                            |                                                                                                 |                                                                                                                                                                                                                         |                                                                                                                                                                                                                                                                                                                                       |                                                                        |
|--------------------------------------|-----------------------------------------------------------------------------------------------------------------------------------------|--------------------------------------------------------------------------------------------------------------------------------------------------------------------------------------------------------------------------------------------------------------------------------------------------------------------------------------------------------------------------------------------|-------------------------------------------------------------------------------------------------|-------------------------------------------------------------------------------------------------------------------------------------------------------------------------------------------------------------------------|---------------------------------------------------------------------------------------------------------------------------------------------------------------------------------------------------------------------------------------------------------------------------------------------------------------------------------------|------------------------------------------------------------------------|
| Elci et al., 2008 (7) (Turkey)       | 78 participants<br>Int: n=39<br>Con: n=39<br>Males: n=66<br>Females: n=12<br>Age, mean $\pm$ SD<br>Int: 60 $\pm$ 9<br>Con: 58 $\pm$ 11  | Inclusion: COPD diagnosis, absence of reversibility in lung function, absence of a diagnosis of any other respiratory disease such as tuberculosis or cancer, ability to understand the PR programme, residence within the Malatya city boundary, signing consent.                                                                                                                         | COPD<br>GOLD stage I-IV                                                                         | To assess the effectiveness of a short-term PR programme in stable COPD patients, when implemented by secondary-care community hospital nurses.<br>RCT, individual                                                      | Home-based PR programme targeting lower (walking) and upper limbs (weights) with 24 sessions over 3 months.<br>F: 2 days/week<br>I: 75% of 6MWT speed (walking)<br>T: 90 min<br>T: Aerobic & Strength<br>Run-in: 1 supervised session<br>Support: Exercise supervised by family member and weekly telephone calls.<br>Con: Usual care | (1) Lung function<br>(2) SF-36, SGRQ, HADS, mMRC, 6MWT                 |
| Hernandez et al., 2000 (8) (Spain)   | 37 participants<br>Int: n=20<br>Con: n=17<br>Gender not reported<br>Age, mean $\pm$ SD<br>Int: 64 $\pm$ 8<br>Con: 63 $\pm$ 7            | Inclusion: Stable disease with optimal drug management, FEV <sub>1</sub> %pred <60%, ex-smoker.<br>Exclusion: AECOPD during study, ischemic heart disease, severe or uncontrolled systemic arterial hypertension, alterations in the thoracic cage, neuromuscular disorders, intermittent claudication, osteoarticular lesions in the lower extremity that could affect normal ambulation. | COPD<br>Stable, moderate                                                                        | To investigate the effectiveness of a simple home-based program of exercise training of the muscles of ambulation, in which the training intensity was applied in standardized form, using the ISWT.<br>RCT, individual | Home/outdoor-based walking exercise programme for 12 weeks.<br>F: 6 days/week<br>I: $\geq$ 70% of max speed of ISWT.<br>T: 1 hour<br>T: Aerobic<br>Run-in: Home visit<br>Support: 2-week reviews at hospital<br>Con: Usual care & 2-week reviews at hospital                                                                          | (1) Lung function<br>(2) ISWT, VO <sub>2</sub> max, BDI/TDI, MRC, CRQ  |
| Ho et al., 2012 (9) (Taiwan)         | 41 participants<br>Int: n=20<br>Con: n=21<br>Males: n=39<br>Females: n=2<br>Age, mean $\pm$ SD<br>Int: 73 $\pm$ 11<br>Con: 75 $\pm$ 10  | Inclusion: COPD diagnosis and currently stable, no AECOPD within last month, do not use oxygen.<br>Exclusion: Previous PR experience, GDS >10, cognitive deficits with SPMSQ <7, unstable heart disease, MSK disease, visual or hearing impairment, any other condition that could affect exercise participation.                                                                          | COPD<br>Stable<br>FEV <sub>1</sub> %pred, mean $\pm$ SD<br>Int: 61 $\pm$ 19<br>Con: 61 $\pm$ 26 | To investigate the effects of paced walking to music at home with an 80% VO <sub>2</sub> peak for patients with COPD.<br>RCT, individual                                                                                | Home-based walking exercise programme paced to music for 12-weeks.<br>F: 5 days/week<br>I: 80% VO <sub>2</sub> peak initially, increased gradually each month based on ISWT.<br>T: 30 min<br>T: Aerobic<br>Run-in: 1 research visit<br>Support: Monthly reviews and progression<br>Con: Usual care                                    | (1) ISWT<br>(2) Lung function, SGRQ, healthcare utilisation            |
| Jaakkola et al., 2019 (10) (Finland) | 89 participants<br>Int: n=44<br>Con: n=45<br>Males: n=19<br>Females: n=70<br>Age, mean $\pm$ SD<br>Int: 40 $\pm$ 14<br>Con: 33 $\pm$ 11 | Inclusion: 16-65 years of age, mild-moderate asthma diagnosis and/or to have received the reimbursement right for asthma medication in the case of newly diagnosed asthma.<br>Exclusion: Severe asthma diagnosis (FEV <sub>1</sub> %pred <60% & PEF variability >30%), short-acting bronchodilator use >3 times daily and/or permanent daily oral steroid treatment, exercise              | Asthma<br>Mild-moderate                                                                         | To test the hypothesis that regular exercise improves asthma control.<br>RCT, individual                                                                                                                                | Home/outdoor-based exercise program (variety of exercises including sports) for 24 weeks. Study also included 12-week assessment.<br>F: 3 days/week (aerobic), 2 days/week (strength)<br>I: 70-80% HRmax<br>T: 30 min<br>T: Aerobic & Strength                                                                                        | (1) Asthma control<br>(2) Exercise amount, muscle strength, 6MST, SGRQ |

|                                      |                                                                                                                                        |                                                                                                                                                                                                                                                                                                                                      |                                                                      |                                                                                                                                                                                                                                                                                                                             |                                                                                                                                                                                                                                                                                                                                                                                                                                        |                                                                     |
|--------------------------------------|----------------------------------------------------------------------------------------------------------------------------------------|--------------------------------------------------------------------------------------------------------------------------------------------------------------------------------------------------------------------------------------------------------------------------------------------------------------------------------------|----------------------------------------------------------------------|-----------------------------------------------------------------------------------------------------------------------------------------------------------------------------------------------------------------------------------------------------------------------------------------------------------------------------|----------------------------------------------------------------------------------------------------------------------------------------------------------------------------------------------------------------------------------------------------------------------------------------------------------------------------------------------------------------------------------------------------------------------------------------|---------------------------------------------------------------------|
|                                      |                                                                                                                                        | >3 times a week, diagnosis of serious coronary heart disease, severe hypertension, severe heart failure, severe musculoskeletal disorder, dementia, and/or physician diagnosed chronic obstructive lung disease.                                                                                                                     |                                                                      |                                                                                                                                                                                                                                                                                                                             | Run-in: 4-week phase to assess suitability and motivation<br>Support: 12-week follow-up and reinforcement<br>Con: Usual care                                                                                                                                                                                                                                                                                                           |                                                                     |
| Lahham et al., 2020 (11) (Australia) | 58 participants<br>Int: n=29<br>Con: n=29<br>Males: n=34<br>Females: n=24<br>Age, mean $\pm$ SD<br>Int: 68 $\pm$ 9<br>Con: 67 $\pm$ 10 | Inclusion: COPD diagnosis, $\geq$ 40 years of age, $\geq$ 10 pack-year smoking history, no hospitalizations or exacerbations 1 month prior to enrolment.<br>Exclusion: Asthma diagnosis or co-morbidities that precluded exercise participation.                                                                                     | COPD<br>Stable, mild                                                 | To test whether a home-based PR program would achieve significant improvements in exercise capacity in people with mild COPD compared to standard care. A secondary aim was to examine the impact of home-based rehabilitation on dyspnoea, health-related quality of life and physical activity levels.<br>RCT, individual | Home-based aerobic (walking) and resistance (upper and lower limb) exercise training for 8 weeks with a 6-month follow-up.<br>F: 5 days/week<br>I: 80% of walking speed from 6MWT. Intensity gauged by Borg scale<br>T: 30 min<br>T: Aerobic & Resistance<br>Run-in: Home visit<br>Support: Weekly motivational interviewing. Better Living with COPD booklet<br>Con: Usual care & weekly phone calls. Better Living with COPD booklet | (1) 6MWT<br>(2) mMRC, CRQ, PAL                                      |
| McGavin et al., 1977 (12) (UK)       | 24 participants<br>Int: n=12<br>Con: n=12<br>Males: n=24<br>Females: n=0<br>Age, mean $\pm$ SD<br>Int: 61 $\pm$ 6<br>Con: 57 $\pm$ 8   | Inclusion: <70 years of age, male gender, chronic bronchitis diagnosis (MRC working party 1965 definitions), chest condition in a stable state.<br>Exclusion: Reversible airway obstruction ( $\uparrow$ 30% FEV <sub>1</sub> post-bronchodilator), corticosteroid use, angina, intermittent claudication, disabling MSK conditions. | Chronic bronchitis<br>Stable<br>Disease characteristics not reported | To evaluate a training scheme which was simple to organise and which could be carried out by the patient unsupervised at home without recourse to hospital facilities.<br>RCT, individual                                                                                                                                   | Home-based stair climbing exercise program for 3 months<br>F: 5 days/week<br>I: Not reported<br>T: 2-10 mins<br>T: Aerobic & Strength<br>Run-in: N/A<br>Support: 2-week clinic follow-up and then monthly follow-ups thereafter<br>Con: Usual care & monthly clinic check-up                                                                                                                                                           | (1) Lung function, blood gases, 12MWD, submaximal exercise capacity |

|                                 |                                                                                                                                          |                                                                                                                                                                                                                                                                                               |                                                                                              |                                                                                                                                                                         |                                                                                                                                                                                                                                                                                                                                                                                                                                                                                       |                                                                                                                           |
|---------------------------------|------------------------------------------------------------------------------------------------------------------------------------------|-----------------------------------------------------------------------------------------------------------------------------------------------------------------------------------------------------------------------------------------------------------------------------------------------|----------------------------------------------------------------------------------------------|-------------------------------------------------------------------------------------------------------------------------------------------------------------------------|---------------------------------------------------------------------------------------------------------------------------------------------------------------------------------------------------------------------------------------------------------------------------------------------------------------------------------------------------------------------------------------------------------------------------------------------------------------------------------------|---------------------------------------------------------------------------------------------------------------------------|
| Mitchell et al., 2014 (13) (UK) | 184 participants<br>Int: n=89<br>Con: n=95<br>Males: n=101<br>Females: n=83<br>Age, mean $\pm$ SD<br>Int: 69 $\pm$ 8<br>Con: 69 $\pm$ 10 | Inclusion: COPD diagnosis, mMRC dyspnoea grade 2-5, clinically stable for 4 weeks.<br>Exclusion: Unable to undertake exercise due to neurological, musculoskeletal or cognitive comorbidities, unable to read English to the reading age of an 8-year-old, had completed PR within 12 months. | COPD Stable<br>FEV <sub>1</sub> %pred, mean $\pm$ SD<br>Int: 56 $\pm$ 17<br>Con: 60 $\pm$ 17 | To establish the short- and medium-term effectiveness of SPACE FOR COPD on patient outcomes, compared with usual care alone.<br>RCT, individual                         | Home-based manual incorporating education and exercise programme (walking, upper and lower limb resistance training using weights) for 6 weeks. Study also included 6-month follow-up.<br>F: Daily (walking), 3 days/week (upper and lower limb training)<br>I: Not reported<br>T: 30 min/day (walking), not reported (upper and lower limb)<br>T: Aerobic & Resistance<br>Run-in: 1 study visit<br>Support: Bi-weekly phone calls using motivational interviewing<br>Con: Usual care | (1) CRQ (dyspnoea domain)<br>(2) CRQ (fatigue, emotion, mastery domains), BCKQ, HADS, ISWT, ESWT, PRAISE, smoking status. |
| Moore et al., 2009 (14) (UK)    | 20 participants<br>Int: n=10<br>Con: n=10<br>Males: n=10<br>Females: n=10<br>Age, median (IQR)<br>Int: 70 (13)<br>Con: 71 (58-79)        | Inclusion: COPD diagnosis with FEV <sub>1</sub> %pred <60%, patients who had not previously attended PR and had access to a video or DVD player at home.<br>Exclusion: Comorbidities that preclude safe exercise training.                                                                    | COPD<br>FEV <sub>1</sub> %pred, median (IQR)<br>Int: 40 (37-49)<br>Con: 42 (30-55)           | To investigate whether a home exercise video programme could improve exercise tolerance and breathlessness in patients with moderate to severe COPD.<br>RCT, individual | Home-based high intensity interval exercise video/DVD for 6 weeks.<br>F: 4 days/week<br>I: High intensity<br>T: 30 min<br>T: Aerobic & Resistance & Strength<br>Run-in: 1 study visit<br>Support: Education material<br>Con: Usual care & education booklet                                                                                                                                                                                                                           | (1) ISWT<br>(2) CRQ                                                                                                       |



|                                            |                                                                                                                                                                                 |                                                                                                                                                                                                                                                                                                                                                                                                                                                                                                                             |                                          |                                                                                                                                                                                                                                                                                                                     |                                                                                                                                                                                                                                                                                                                                                                                                                       |                                                                                                                   |
|--------------------------------------------|---------------------------------------------------------------------------------------------------------------------------------------------------------------------------------|-----------------------------------------------------------------------------------------------------------------------------------------------------------------------------------------------------------------------------------------------------------------------------------------------------------------------------------------------------------------------------------------------------------------------------------------------------------------------------------------------------------------------------|------------------------------------------|---------------------------------------------------------------------------------------------------------------------------------------------------------------------------------------------------------------------------------------------------------------------------------------------------------------------|-----------------------------------------------------------------------------------------------------------------------------------------------------------------------------------------------------------------------------------------------------------------------------------------------------------------------------------------------------------------------------------------------------------------------|-------------------------------------------------------------------------------------------------------------------|
| <p>Nguyen et al., 2013 (15) (USA)</p>      | <p>125 participants*<br/>Int(1): n=43<br/>Int(2): n=41<br/>Con: n=41<br/>Males: n=68<br/>Females: n=57<br/>Age, mean ± SD<br/>Int(1): 69±11<br/>Int(2): 68±10<br/>Con: 69±8</p> | <p>Inclusion: COPD diagnosis (classic criteria or FEV<sub>1</sub>/FVC &lt;0.60 with FEV<sub>1</sub>&gt;80% predicted or CT confirmed emphysema) &amp; clinically stable for at least one month, activities limited by dyspnoea, use of the Internet, oxygen saturation &gt;85% on room air on ≤6L/min of oxygen at the end of a 6MWT. Exclusion: Active symptomatic illness (e.g., cancer, heart failure), participated in PR &lt;6-months ago, or currently participating in &gt;2 days a week of supervised exercise.</p> | <p>COPD<br/>Stable, mild-very severe</p> | <p>To test the efficacy of two 12-month dyspnoea self-management programs, Internet-based and face-to-face, compared with a general health education control on the primary outcome of dyspnoea with activities.<br/>RCT, individual</p>                                                                            | <p>Self-management program incorporating exercise intervention (online or face-to-face) for 12 months. Study included 3- &amp; 6-month follow-ups.<br/>F: 4 days/week<br/>I: Gauged by Borg score<br/>T: 30 min<br/>T: Aerobic &amp; Strength<br/>Run-in: Home visit<br/>Support: Bi-weekly reinforcement and feedback with motivational interviewing.<br/>Con: Usual care, bi-weekly phone calls &amp; education</p> | <p>(1) CRQ (dyspnoea domain)<br/>(2) 6MWT, ITT, muscular endurance, CRQ (other domains), SF-36, self-efficacy</p> |
| <p>Pradella et al., 2015 (16) (Brazil)</p> | <p>44 participants<br/>Int: n=29<br/>Con: n=15<br/>Males: n=36<br/>Females: n=8<br/>Age, mean ± SD<br/>Int: 65±8<br/>Con: 62±11</p>                                             | <p>Inclusion: COPD diagnosis, 40-75 years of age, either gender, signed consent. Exclusion: PR participation within 12 months, regular physical activity ≥3 times a week in the past 12 months, other diseases which leads to exercise intolerance, exacerbations within past 4 weeks.</p>                                                                                                                                                                                                                                  | <p>COPD<br/>Stable, mild-very severe</p> | <p>To develop an efficient, low-cost, home-based PR program. To evaluate the impact of the program on exercise as measured by the 6MWT and treadmill endurance test. To assess the effect on quality of life in subjects with COPD under partial supervision compared with a control group.<br/>RCT, individual</p> | <p>Home-based walking PR program for 24 sessions<br/>F: 3 days/week<br/>I: 60-70% HRmax<br/>T: 40 min<br/>T: Aerobic<br/>Run-in: 1-week run-in at rehab centre<br/>Support: Educational booklet &amp; weekly phone call<br/>Con: Usual care &amp; weekly phone call</p>                                                                                                                                               | <p>(1) Lung function<br/>(2) 6MWT, SGRQ, lower-limb endurance test</p>                                            |

\*Contained 2 relevant intervention groups. AECOPD = acute exacerbation of chronic obstructive pulmonary disease, Int = Intervention group, Con = Control group, FEV<sub>1</sub> %pred = Forced expiratory volume in 1 second % of predicted, RCT = Randomised controlled trial, CRQ = Chronic respiratory disease questionnaire, PAL = Physical activity levels, NYHA = New York Heart Association, GOLD = Global initiative for chronic obstructive lung disease, FITT = Frequency, Intensity, Time, Type, N/A = Not applicable, 6MWT = 6 minute walk test, mMRC = Modified medical research council, PASE = Physical activity scale for the elderly, BARTHEL = Barthel index, CAT = COPD assessment tool, ADL = Activities of daily living, Ex = Exercise group, Phys = Exercise + physio group, SGRQ = St Georges respiratory questionnaire, FEV<sub>1</sub>/FVC = Forced expiratory volume in 1 / forced vital capacity, ECP = Eosinophil cationic protein, ACQ = Asthma control questionnaire, HRmax = Maximum heart rate, PR = Pulmonary rehabilitation, SNAPPS = Smoking, nutrition, alcohol consumption, physical activity, psychological well-being, symptom management health behaviours, FTSST = 5 times sit to stand test, MSK = Musculoskeletal, BODE = Index for body mass index, airflow obstruction, dyspnoea and exercise, SF-36 = 36 item short form survey, HADS = Hospital anxiety and depression scale, LTOT = Long-term oxygen therapy, GLTEQ = Godin leisure time exercise questionnaire, ISWT = Incremental shuttle walk test, BDI/TDI = Baseline dyspnoea index / transition dyspnoea index, VO<sub>2</sub>max = maximal oxygen uptake, VO<sub>2</sub>peak = peak oxygen uptake, GDS = Geriatric depression scale, SPMSQ = Short portable mental status questionnaire, PEF = Peak expiratory flow, 6MST = 6 minute stepper test, 12MWD = 12 minute walk distance, BCKQ = Bristol COPD knowledge questionnaire, PRAISE = Pulmonary rehabilitation adapted index of self-efficacy, SPACE = Self-management programme of activity, coping and education, ESWT = Endurance shuttle walk test, IQR = Interquartile range, ITT = Incremental treadmill test.

**Table S4.** Risk of Bias Assessment

| <b>Study</b>            | <b>Random sequence generation</b> | <b>Allocation concealment</b> | <b>Blind participants and personnel</b> | <b>Blind outcome assessment</b> | <b>Incomplete outcome data</b> | <b>Selective reporting (reporting bias)</b> | <b>Other bias</b> | <b>Overall risk</b> |
|-------------------------|-----------------------------------|-------------------------------|-----------------------------------------|---------------------------------|--------------------------------|---------------------------------------------|-------------------|---------------------|
| Booker 1984 (1)         | Unclear                           | Unclear                       | High                                    | Low                             | Unclear                        | High                                        | Low               | <b>High</b>         |
| Bourbeau 2003 (2)       | Low                               | Low                           | High                                    | Low                             | Low                            | Low                                         | Low               | <b>Moderate</b>     |
| Boyd 2012 (3)           | Low                               | Low                           | High                                    | Unclear                         | Low                            | Low                                         | Low               | <b>Moderate</b>     |
| Cameron-Tucker 2016 (4) | Low                               | Low                           | High                                    | Low                             | Low                            | High                                        | Low               | <b>High</b>         |
| Chen 2018 (5)           | Low                               | Unclear                       | High                                    | Unclear                         | Low                            | Unclear                                     | Low               | <b>High</b>         |
| De Oliveira 2010 (6)    | Low                               | Unclear                       | High                                    | Unclear                         | High                           | Unclear                                     | Low               | <b>High</b>         |
| Elci 2008 (7)           | Low                               | Unclear                       | High                                    | Low                             | Unclear                        | Low                                         | Unclear           | <b>High</b>         |
| Hernandez 2000 (8)      | Unclear                           | Unclear                       | High                                    | Unclear                         | High                           | Low                                         | Low               | <b>High</b>         |
| Ho 2012 (9)             | Low                               | Unclear                       | High                                    | Low                             | Low                            | Low                                         | Low               | <b>Moderate</b>     |
| Jaakkola 2019 (10)      | Unclear                           | Unclear                       | High                                    | Unclear                         | High                           | High                                        | Low               | <b>High</b>         |
| McGavin 1977 (12)       | Unclear                           | Unclear                       | High                                    | Unclear                         | High                           | Low                                         | Low               | <b>High</b>         |
| Mitchell 2014 (13)      | Low                               | Low                           | High                                    | Low                             | Low                            | Unclear                                     | Low               | <b>Moderate</b>     |
| Moore 2009 (14)         | Low                               | Low                           | High                                    | High                            | High                           | Low                                         | Low               | <b>High</b>         |
| Lahham 2020 (11)        | Low                               | Low                           | High                                    | Low                             | Low                            | Low                                         | Low               | <b>Moderate</b>     |
| Nguyen 2013 (15)        | Unclear                           | Unclear                       | High                                    | Unclear                         | Low                            | High                                        | Low               | <b>High</b>         |
| Pradella 2015 (16)      | Unclear                           | Unclear                       | High                                    | Unclear                         | Low                            | Low                                         | Low               | <b>High</b>         |

**Table S5.** Narrative summary of findings not included in the meta-analyses

| Outcome                         | Study              | Outcome measurement            | Diagnosis          | Duration of follow-up | Outcome reporting          | Findings                                                                                                                          |                                                                                              |                                                                                                                                                                                                           |
|---------------------------------|--------------------|--------------------------------|--------------------|-----------------------|----------------------------|-----------------------------------------------------------------------------------------------------------------------------------|----------------------------------------------------------------------------------------------|-----------------------------------------------------------------------------------------------------------------------------------------------------------------------------------------------------------|
|                                 |                    |                                |                    |                       |                            | Intervention                                                                                                                      | Control                                                                                      | Reported stats                                                                                                                                                                                            |
| Exercise performance / capacity | Mitchell 2014 (13) | ESWT                           | COPD               | 6 weeks               | Change from baseline       | Mean (95% CI)<br>Time: +210 secs (122 to 297)                                                                                     | Mean (95% CI)<br>Time: +92 secs (33 to 151)                                                  | Mean difference (95% CI)<br>Time: 118 secs (17 to 219), p = 0.006                                                                                                                                         |
|                                 | McGavin 1977 (12)  | 12MWD                          | Chronic Bronchitis | 3 months              | Change from baseline       | Mean (range)<br>Distance: ↑64 metres (0 to 165)                                                                                   | Mean (range)<br>Distance: ↓19 metres (-105 to 55)                                            | Intervention: p < 0.001<br>Control: p > 0.05                                                                                                                                                              |
|                                 | Pradella 2015 (16) | Endurance treadmill test       | COPD               | 8 weeks               | Change from baseline       | Mean difference ± SD<br>Distance: 317 ± 82 metres                                                                                 | Mean difference ± SD<br>Distance: 31 ± 420 metres                                            | Mean difference (95% CI): 285 metres (-7 to 564)                                                                                                                                                          |
| Health-related Quality of Life  | Jaakkola 2019 (10) | SGRQ                           | Asthma             | 24 weeks              | No data reported           | No data reported                                                                                                                  | No data reported                                                                             | No data reported                                                                                                                                                                                          |
|                                 | Nguyen 2013 (15)   | CRQ                            | COPD               | 12 months             | Change from baseline       | Mean difference<br>Total: Group 1 (↑8.4 points), Group 2 (↑4.9 points)<br>Dyspnoea: Group 1 (↑2.2 points), Group 2 (↑0.6 points)  | Mean difference<br>Total: ↑2.2 points<br>Dyspnoea: ↑0.7 points                               | Group differences: Total (p = 0.28), Dyspnoea (p = 0.23)<br>Time effect: Total (p < 0.01), Dyspnoea (p = 0.01)<br>Group and time interaction: Total (p = 0.44), Dyspnoea (p = 0.48)                       |
|                                 | Elci 2008 (7)      | SF-36                          | COPD               | 3 months              | Baseline data not reported | Baseline data not reported                                                                                                        | Baseline data not reported                                                                   | Baseline data not reported                                                                                                                                                                                |
|                                 | Nguyen 2013 (15)   | SF-36                          | COPD               | 12 months             | Change from baseline       | Mean difference<br>Physical: Group 1 (↑4.4 points), Group 2 (↑1.6 points)<br>Mental: Group 1 (↓1.1 points), Group 2 (↑1.9 points) | Mean difference<br>Physical: ↑1.5 points<br>Mental: ↓1.0 points                              | Group differences: Physical (p = 0.68), Mental (p = 0.30)<br>Time effect: Physical (p < 0.01), Mental (p = 0.84)<br>Group and time interaction: Physical (p = 0.63), Mental (p = 0.54)                    |
| Subjective symptoms             | Hernandez 2000 (8) | BDI/TDI                        | COPD               | 12 weeks              | Change from baseline       | Mean difference<br>BDI: ↑1.6 points<br>MT: ↑0.5 points<br>FI: ↑0.6 points<br>ME: ↑0.6 points                                      | Mean difference<br>BDI: ↓0.3 points<br>MT: ↑0.2 points<br>FI: ↓0.2 points<br>ME: ↑0.2 points | BDI: Intervention (p = 0.03), Control (p > 0.05)<br>MT: Intervention (p = 0.05), Control (p > 0.05)<br>FI: Intervention (p = 0.03), Control (p > 0.05)<br>ME: Intervention (p = 0.01), Control (p > 0.05) |
| Anxiety & Depression            | Booker 1984 (1)    | Mood disturbance questionnaire | COPD               | 9 weeks               | Change from baseline       | No data reported                                                                                                                  | No data reported                                                                             | Significant ↓ in total score in exercise                                                                                                                                                                  |

|                                   |                         |                                    |        |          |                                                     |                                                                                               |                                                                                             |                                                                                                                            |
|-----------------------------------|-------------------------|------------------------------------|--------|----------|-----------------------------------------------------|-----------------------------------------------------------------------------------------------|---------------------------------------------------------------------------------------------|----------------------------------------------------------------------------------------------------------------------------|
|                                   |                         |                                    |        |          |                                                     |                                                                                               |                                                                                             | physiotherapy + exercise group. No significant changes in exercise alone or control groups.                                |
|                                   | Mitchell 2014 (13)      | HADS                               | COPD   | 6 weeks  | Change from baseline                                | Mean (95% CI)<br>Anxiety: -0.7 points (-1.3 to -1.8)<br>Depression: -0.5 points (-1.0 to 0.0) | Mean (95% CI)<br>Anxiety: 0.1 points (-0.4 to 0.62)<br>Depression: 0.2 points (-0.3 to 0.8) | Mean difference (95% CI)<br>Anxiety: -0.9 points (-1.6 to -1.0), p = 0.04<br>Depression: -0.7 points (-1.5 to 0), p = 0.10 |
|                                   | Elci 2008 (7)           | HADS                               | COPD   | 3 months | Change from baseline                                | Mean difference<br>Total: $\downarrow$ 4.0 points                                             | Mean difference<br>Total: $\uparrow$ 0.8 points                                             | Intervention: p < 0.01<br>Control: p = 0.07                                                                                |
| Disease impact                    | Boyd 2012 (3)           | ACQ                                | Asthma | 12 weeks | Change from baseline                                | Mean difference<br>Total: $\downarrow$ 0.22 points                                            | Mean difference<br>Total: $\downarrow$ 0.73 points                                          | p > 0.05                                                                                                                   |
|                                   | Jaakkola 2019 (10)      | ACT                                | Asthma | 24 weeks | Change from baseline (total number of participants) | Improved: n=26<br>No change: n=7<br>Worsened: n=9                                             | Improved: n=17<br>No change: n=17<br>Worsened: n=10                                         | Risk difference (95% CI): 0.233 (0.027 to 0.438), p = 0.032                                                                |
|                                   | Cameron-Tucker 2016 (4) | CAT                                | COPD   | 8 weeks  | Change from baseline                                | Median difference (IQR)<br>Total: 0 (6)                                                       | Median difference (IQR)<br>Total: 0 (6)                                                     | p = 0.48                                                                                                                   |
|                                   | Chen 2018 (5)           | CAT                                | COPD   | 12 weeks | Change from baseline                                | Mean difference<br>Total: $\downarrow$ 3.2 points                                             | Mean difference<br>Total: $\downarrow$ 1.3 points                                           | Intervention: p < 0.01<br>Control: p = 0.20<br>Between group: p = 0.98                                                     |
| Hospital admissions (respiratory) | Bourbeau 2003 (2)       | Self-report                        | COPD   | 1 year   | Total number of events during observation period    | Total events: 78                                                                              | Total events: 118                                                                           | Treatment difference: -39.8% (p = 0.01)                                                                                    |
|                                   | Ho 2012 (9)             | Self-report and healthcare records | COPD   | 12 weeks | Total number of events during observation period    | Data not interpretable                                                                        | Data not interpretable                                                                      | No significant differences between groups for hospital admission due to AECOPD                                             |
| Mortality                         | Bourbeau 2003 (2)       | Healthcare records                 | COPD   | 1 year   | Total number of events during observation period    | Total events: 5                                                                               | Total events: 9                                                                             | Statistics not reported                                                                                                    |
| Exacerbations                     | Bourbeau 2003 (2)       | Self-report                        | COPD   | 1 year   | Total number of events during observation period    | Total events: 299                                                                             | Total events: 362                                                                           | p = 0.06                                                                                                                   |
| Hospital admission (all-cause)    | Ho 2012 (9)             | Self-report and healthcare records | COPD   | 12 weeks | Total number of events during observation period    | Data not interpretable                                                                        | Data not interpretable                                                                      | No data reported                                                                                                           |
| Length of stay                    | Ho 2012 (9)             | Self-report and healthcare records | COPD   | 12 weeks | Mean duration of stay during observation period     | Mean $\pm$ SD<br>LOS: 0.2 $\pm$ 1.4                                                           | Mean $\pm$ SD<br>LOS: 0.3 $\pm$ 1.3                                                         | p = 0.64                                                                                                                   |
| Emergency department visits       | Bourbeau 2003 (2)       | Self-report                        | COPD   | 1 year   | Total number of events during observation period    | Total events<br>AECOPD: 95<br>Other cause: 57                                                 | Total events<br>AECOPD: 161<br>Other cause: 74                                              | Treatment difference<br>AECOPD: -41.0% (p = 0.02)                                                                          |

|                            |                    |                                    |                    |           |                                                 |                                                                                                                                                                                                                                                                                                                                                                             |                                                                                                                                                                                                                                                                                                                                                        |                                                                                                                                                                                        |
|----------------------------|--------------------|------------------------------------|--------------------|-----------|-------------------------------------------------|-----------------------------------------------------------------------------------------------------------------------------------------------------------------------------------------------------------------------------------------------------------------------------------------------------------------------------------------------------------------------------|--------------------------------------------------------------------------------------------------------------------------------------------------------------------------------------------------------------------------------------------------------------------------------------------------------------------------------------------------------|----------------------------------------------------------------------------------------------------------------------------------------------------------------------------------------|
|                            |                    |                                    |                    |           |                                                 |                                                                                                                                                                                                                                                                                                                                                                             |                                                                                                                                                                                                                                                                                                                                                        | Other cause:<br>-23.0% (p = 0.34)                                                                                                                                                      |
|                            | Ho 2012 (9)        | Self-report and healthcare records | COPD               | 12 weeks  | Mean number of events during observation period | Mean $\pm$ SD<br>ED visits: 0.0 $\pm$ 0.2                                                                                                                                                                                                                                                                                                                                   | Mean $\pm$ SD<br>ED visits: 0.0 $\pm$ 0.3                                                                                                                                                                                                                                                                                                              | p = 0.52                                                                                                                                                                               |
| Outpatient visits          | Bourbeau 2003 (2)  | Self-report                        | COPD               | 1 year    | Mean number of events during observation period | Data not interpretable                                                                                                                                                                                                                                                                                                                                                      | Data not interpretable                                                                                                                                                                                                                                                                                                                                 | Data not interpretable                                                                                                                                                                 |
| Aerobic fitness / capacity | Boyd 2012 (3)      | Graded treadmill test              | Asthma             | 12 weeks  | Change from baseline                            | Mean difference<br>VO <sub>2 peak</sub> : $\uparrow$ 2.64 ml/min/kg<br>Time: $\uparrow$ 1.39 min<br>RER: $\uparrow$ 0.04                                                                                                                                                                                                                                                    | Not measured in control group                                                                                                                                                                                                                                                                                                                          | VO <sub>2 peak</sub> : p < 0.05<br>Time: p < 0.05<br>RER: p > 0.05                                                                                                                     |
|                            | Hernandez 2000 (8) | Incremental cycle ergometer test   | COPD               | 12 weeks  | Change from baseline                            | Mean difference<br>Workload: $\downarrow$ 2.8 watts<br>VO <sub>2 max</sub> : $\uparrow$ 0.1 l.min <sup>-1</sup><br>VO <sub>2</sub> : $\uparrow$ 0.5 l.min <sup>-1</sup><br>VCO <sub>2</sub> : $\downarrow$ 0.1 l.min <sup>-1</sup><br>V <sub>E</sub> : $\downarrow$ 0.5 l.min <sup>-1</sup><br>Dyspnoea: $\downarrow$ 0.7 points<br>Leg discomfort: $\downarrow$ 1.0 points | Mean difference<br>Workload: $\uparrow$ 2.9 watts<br>VO <sub>2 max</sub> : $\uparrow$ 0.1 l.min <sup>-1</sup><br>VO <sub>2</sub> : $\uparrow$ 1.5 l.min <sup>-1</sup><br>VCO <sub>2</sub> : 0 l.min <sup>-1</sup><br>V <sub>E</sub> : $\uparrow$ 1.4 l.min <sup>-1</sup><br>Dyspnoea: $\downarrow$ 1.1 points<br>Leg discomfort: $\uparrow$ 1.1 points | All, p > 0.05                                                                                                                                                                          |
|                            | Jaakkola 2019 (10) | Spiroergometry                     | Asthma             | 24 weeks  | No data reported                                | No data reported                                                                                                                                                                                                                                                                                                                                                            | No data reported                                                                                                                                                                                                                                                                                                                                       | No data reported                                                                                                                                                                       |
|                            | McGavin 1977 (12)  | Incremental cycle ergometer test   | Chronic Bronchitis | 3 months  | Change from baseline                            | Mean<br>Workload: $\uparrow$ 14.4 watts<br>VO <sub>2</sub> : $\uparrow$ 1.3 l.min <sup>-1</sup><br>V <sub>E</sub> : $\uparrow$ 4 l.min <sup>-1</sup>                                                                                                                                                                                                                        | Mean<br>Workload: $\downarrow$ 2.6 watts<br>VO <sub>2</sub> : $\downarrow$ 121 ml.min <sup>-1</sup><br>V <sub>E</sub> : $\downarrow$ 2 l.min <sup>-1</sup>                                                                                                                                                                                             | Workload: Intervention (p < 0.05), control (p > 0.05)<br>VO <sub>2</sub> : Intervention (p > 0.05), control (p < 0.05)<br>V <sub>E</sub> : Intervention (p > 0.05), control (p > 0.05) |
|                            | Nguyen 2013 (15)   | Incremental treadmill test         | COPD               | 12 months | Change from baseline                            | No data reported                                                                                                                                                                                                                                                                                                                                                            | No data reported                                                                                                                                                                                                                                                                                                                                       | No differences among groups                                                                                                                                                            |
| Peripheral muscle strength | Chen 2018 (5)      | CON-TREX leg extensor              | COPD               | 12 weeks  | Change from baseline                            | Mean difference<br>Isometric: $\uparrow$ 17.1 Nm<br>Isokinetic: $\uparrow$ 14.3 Nm                                                                                                                                                                                                                                                                                          | Mean difference<br>Isometric: $\uparrow$ 11.8 Nm<br>Isokinetic: $\uparrow$ 4.6 Nm                                                                                                                                                                                                                                                                      | Isometric: Intervention (p < 0.01), Control (p = 0.02)<br>Isokinetic: Intervention (p < 0.01), Control (p = 0.06)<br>Between groups:<br>Isometric (p = 0.78),<br>Isokinetic (p = 0.87) |
|                            | Jaakkola 2019 (10) | Unclear                            | Asthma             | 24 weeks  | No data reported                                | No data reported                                                                                                                                                                                                                                                                                                                                                            | No data reported                                                                                                                                                                                                                                                                                                                                       | No data reported                                                                                                                                                                       |
|                            | Nguyen 2013 (15)   | Arm endurance                      | COPD               | 12 months | Change from baseline                            | Mean (pre vs post)<br>Lifts per min: Group 1 ( $\uparrow$ 11.9 reps), Group 2 ( $\uparrow$ 11.1 reps)                                                                                                                                                                                                                                                                       | Mean (pre vs post)<br>Lifts per min: $\uparrow$ 1.7 reps                                                                                                                                                                                                                                                                                               | Group differences: p = 0.33<br>Time effect: p < 0.01                                                                                                                                   |

|                          |                         |                                            |      |         |                      |                                                                                                                                                                                                         |                                                                                                                                                                                                          |                                                                                                                                                                                                                                             |
|--------------------------|-------------------------|--------------------------------------------|------|---------|----------------------|---------------------------------------------------------------------------------------------------------------------------------------------------------------------------------------------------------|----------------------------------------------------------------------------------------------------------------------------------------------------------------------------------------------------------|---------------------------------------------------------------------------------------------------------------------------------------------------------------------------------------------------------------------------------------------|
|                          |                         |                                            |      |         |                      |                                                                                                                                                                                                         |                                                                                                                                                                                                          | Group and time interaction: $p = 0.04$                                                                                                                                                                                                      |
| Physical activity levels | Cameron-Tucker 2016 (4) | SNAPPS questionnaire and self-report diary | COPD | 8 weeks | Change from baseline | Median difference (IQR)<br>SNAPPS: 0 (4)<br>Mins per day of walking: 14 (26)                                                                                                                            | Median difference (IQR)<br>SNAPPS: 0 (4)<br>Mins per day of walking: 16 (40)                                                                                                                             | SNAPPS: $p = 0.40$<br>Mins per day of walking: $p = 0.10$                                                                                                                                                                                   |
|                          | Lahham 2020 (11)        | Accelerometer                              | COPD | 8 weeks | Change from baseline | Mean difference (95% CI)<br>Total EE: -4 (-1425 to 1418)<br>Steps: 303 (-1607 to 2215)<br>METs/day: 0.1 (-0.1 to 0.2)<br>Sedentary time: 32 min/day (-63 to 128)<br>MVPA time: -5 min/day (-301 to 290) | Mean difference (95% CI)<br>Total EE: 82 (-1299 to 1463)<br>Steps: -106 (-1962 to 1749)<br>METs/day: 0.0 (-0.2 to 0.2)<br>Sedentary time: 8 min/day (-84 to 101)<br>MVPA time: -211 min/day (-497 to 76) | Between group mean differences (95% CI), Home-Standard Care<br>Total EE: -678 (-2190 to 839)<br>Steps: 1089 (-946 to 3125)<br>METs/day: 0.1 (-0.1 to 0.2)<br>Sedentary time: 15 min/day (-86 to 116)<br>MVPA time: -8 min/day (-330 to 314) |

ESWT = endurance shuttle walk test, CI = confidence interval, Secs = seconds, 12MWD = Twelve-minute walk distance, SGRQ = St. Georges respiratory questionnaire, CRQ = Chronic respiratory disease questionnaire, BDI/TDI = Baseline and transition dyspnoea index, HADS = Hospital anxiety and depression scale, ACQ = Asthma control questionnaire, ACT = Asthma control test, CAT = COPD assessment tool, IQR = Interquartile range, SF-36 = Short form-36 questionnaire, AECOPD = Acute exacerbation of COPD, LOS = Length of stay, ED = Emergency department,  $VO_{2\text{ peak}}$  = Peak oxygen uptake, RER = Respiratory exchange ratio,  $VO_{2\text{ max}}$  = Maximal oxygen uptake,  $V_E$  = Minute ventilation, SD = Standard deviation, Nm = Newton metres, Reps = Repetitions, Min = minute, EE = Energy expenditure, MVPA = Moderate to vigorous physical activity.

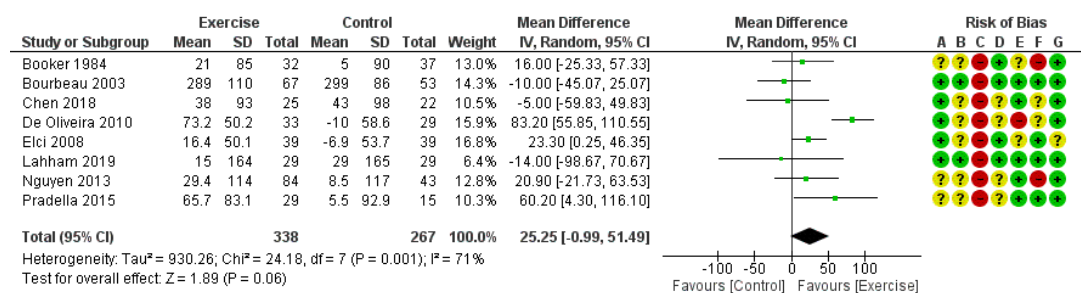

**Figure S1.** Trial-level data, effect estimates, and forest plot of comparison for change in 6MWT distance following an unsupervised exercise intervention versus usual care for all studies reporting 6MWT, including studies for which data were unclear or not available in published reports (1, 2, 6) and were retrieved from previous systematic reviews (17-19). Risk of bias legend: A) Random sequence generation (selection bias), B) Allocation concealment (selection bias), C) Blinding of participants and personnel (performance bias), D) Blinding of outcome assessment (detection bias), E) Incomplete outcome data (attrition bias), F) Selective reporting (reporting bias), G) Other bias.

## References

1. Booker HA. Exercise training and breathing control in patients with chronic airflow limitation. *Physiotherapy*. 1984;70(7):258-60.
2. Bourbeau J, Julien M, Maltais F, Rouleau M, Beupré A, Bégin R, et al. Reduction of hospital utilization in patients with chronic obstructive pulmonary disease: a disease-specific self-management intervention. *Arch Intern Med*. 2003;163(5):585-91.
3. Boyd A, Yang CT, Estell K, Ms CT, Gerald LB, Dransfield M, et al. Feasibility of exercising adults with asthma: a randomized pilot study. *Allergy Asthma Clin Immunol [Internet]*. 2012 2012/08//; 8(1):[13 p.].
4. Cameron-Tucker HL, Wood-Baker R, Joseph L, Walters JA, Schüz N, Walters EH. A randomized controlled trial of telephone-mentoring with home-based walking preceding rehabilitation in COPD. *Int J Chron Obstruct Pulmon Dis*. 2016;11:1991-2000.
5. Chen Y, Niu M, Zhang X, Qian H, Xie A, Wang X. Effects of home-based lower limb resistance training on muscle strength and functional status in stable Chronic obstructive pulmonary disease patients. *J Clin Nurs*. 2018;27(5-6):e1022-e37.
6. Mendes de Oliveira JC, Studart Leitão Filho FS, Malosa Sampaio LM, Negrinho de Oliveira AC, Hirata RP, Costa D, et al. Outpatient vs. home-based pulmonary rehabilitation in COPD: a randomized controlled trial. *Multidiscip Respir Med*. 2010;5(6):401-8.
7. Elçi A, Börekçi S, Ovayolu N, Elbek O. The efficacy and applicability of a pulmonary rehabilitation programme for patients with COPD in a secondary-care community hospital. *Respirology*. 2008;13(5):703-7.



8. Hernández MT, Rubio TM, Ruiz FO, Riera HS, Gil RS, Gómez JC. Results of a home-based training program for patients with COPD. *Chest*. 2000;118(1):106-14.
9. Ho CF, Maa SH, Shyu YI, Lai YT, Hung TC, Chen HC. Effectiveness of paced walking to music at home for patients with COPD. *Copd*. 2012;9(5):447-57.
10. Jaakkola JJK, Aalto SAM, Hernberg S, Kiihamäki S-P, Jaakkola MS. Regular exercise improves asthma control in adults: A randomized controlled trial. *Scientific Reports*. 2019;9(1):12088.
11. Lahham A, McDonald CF, Moore R, Cox NS, Rawlings S, Nichols A, et al. The impact of home-based pulmonary rehabilitation on people with mild chronic obstructive pulmonary disease: A randomised controlled trial. *Clin Respir J*. 2020;14(4):335-44.
12. McGavin CR, Gupta SP, Lloyd EL, McHardy GJ. Physical rehabilitation for the chronic bronchitic: results of a controlled trial of exercises in the home. *Thorax*. 1977;32(3):307-11.
13. Mitchell KE, Johnson-Warrington V, Apps LD, Bankart J, Sewell L, Williams JE, et al. A self-management programme for COPD: a randomised controlled trial. *Eur Respir J*. 2014;44(6):1538-47.
14. Moore J, Fiddler H, Seymour J, Grant A, Jolley C, Johnson L, et al. Effect of a home exercise video programme in patients with chronic obstructive pulmonary disease. *J Rehabil Med*. 2009;41(3):195-200.
15. Nguyen HQ, Donesky D, Reinke LF, Wolpin S, Chyall L, Benditt JO, et al. Internet-based dyspnea self-management support for patients with chronic obstructive pulmonary disease. *Journal of pain and symptom management*. 2013;46(1):43-55.

16. Pradella CO, Belmonte GM, Maia MN, Delgado CS, Luise AP, Nascimento OA, et al. Home-Based Pulmonary Rehabilitation for Subjects With COPD: A Randomized Study. *Respir Care*. 2015;60(4):526-32.
17. Alison JA, McKeough ZJ, Johnston K, McNamara RJ, Spencer LM, Jenkins SC, et al. Australian and New Zealand Pulmonary Rehabilitation Guidelines. *Respirology*. 2017;22(4):800-19.
18. McCarthy B, Casey D, Devane D, Murphy K, Murphy E, Lacasse Y. Pulmonary rehabilitation for chronic obstructive pulmonary disease. *Cochrane Database of Systematic Reviews*. 2015(2).
19. Zwerink M, Brusse-Keizer M, van der Valk PD, Zielhuis GA, Monninkhof EM, van der Palen J, et al. Self management for patients with chronic obstructive pulmonary disease. *Cochrane Database Syst Rev*. 2014;2014(3):Cd002990.
